# Supplementary material for: First triple-wavelength lidar observations of depolarization and extinction-to-backscatter ratios of Saharan dust
Source: Copernicus journal article supplement (doi:10.5194/acp-2021-608), 2021-07-30
Supplement: Supplementary file [file acp-2021-608-AC1-supplement.pdf]

Dear anonymous referee,

Thank you very much for your time and effort you spend on reviewing our manuscript. We are grateful to your detailed comments and suggestions. And we did our best to incorporate them into the manuscript.

First, we want to introduce the major changes on the manuscript:

1. Motivated by your comments, we checked the cross talk from the elastic wavelength in the 1058 nm Raman channel. Indeed, a cross talk was present and has been corrected (see below). Furthermore, a temperature correction was applied.
2. In the discussion, a dedicated section for the comparison of the AOD and Ångström exponents was introduced. Furthermore, the vertical profiles of the extinction and backscatter Ångström exponent were included in Figure 1 + 3.
3. We strengthened the point, that the columnar photometer results include the fine-mode pollution in the planetary boundary layer, whereas the lidar results focus on the Saharan dust layer.

Now, we respond in bold to your specific comments. Attached, you'll find the revised version of the manuscript with changes indicated in bold.

Concerning the technique for measuring the 1064nm extinction coefficient

*Two interference filters (IFF) with a bandwidth of 9nm are placed one after the other before the infrared Raman channel in order to suppress the light from the elastic scattering. Even though the transmission information at 1064nm from the manufacturer seems sufficient for this, factors such as the temperature and/or the incidence angle of the collected light on the IFF could shift the transmission spectrum of the IFF allowing cross-talks from the elastic line. Have the authors checked that this is not the case experimentally? This can be checked by placing a third typical IFF centered at 1064nm in the rotational Raman channel and see if any significant amount of light is detected.*

**We are thankful for the reviewer's suggestions. Unfortunately, we are not able to check the cross talk experimentally as suggested, because the two Raman filters are currently installed in our new system at Cabo Verde. New filters are ordered but haven't arrived yet. Nevertheless, we investigated the issue of possible cross-talk using the water clouds at around 4 km height in the measurement of 22 February 2021 (case study 1). And indeed, we found some signal from the clouds in our 1058 Raman channel. Thus, we subtracted the elastic signal (1064 nm) times a cross -talk factor from our Raman signal (1058). We were iterating the cross-talk factor until the influence of the clouds vanished from our Raman signal at cloud base. We could not use the center of the cloud because the elastic signal was saturated there. Additionally, we scaled the 607 nm Raman signal to check the slope of the decreasing 1058 nm Raman signal in the first 100 m of the cloud. We found a cross-talk factor of  $0.0175 \pm 0.0005$ , so 1.75% of our elastic signal were detected in the Raman channel. We implemented the cross-talk correction of the 1058 nm Raman signal in our data processing and added the following statement to the manuscript (lines 84-88):**

**"However, still some cross-talk from the elastic signal at 1064 nm was present in the Raman channel. The enhanced signal received from the liquid clouds on 22 February 2021 (Section 3.1) was used to estimate the cross-talk factor of  $0.0175 \pm 0.0005$ . For the further analysis, the elastic signal at 1064 nm**

**multiplied by the cross-talk factor was subtracted from the Raman signal at 1058 nm to correct for the cross talk. In this simple approach, the cross talk is assumed to be temperature independent."**

**We are grateful for the reviewer's comment, because the cross-talk correction is important for a proper extinction measurement.**

*In addition, the Raman spectrum is affected by the air temperature. Is the bandwidth of the IFF sufficient to eliminate any temperature effects in the profiles? What are the uncertainties? Even if such issues are reported in a previous study, a reference must be added along with a few lines explaining the main findings.*

**Thank you for pointing to the temperature effect. The previous study (Haarig et al., AMT 2016) stated: "The detected Raman backscatter intensity is only weakly temperature dependent (4% increase of the measured rotational Raman signal for a temperature decrease from 300 to 230 K)." However, we calculated the temperature dependence of our Raman filters, again, using the temperature range relevant for the present study. We found that the temperature dependent transmission of the oxygen and nitrogen Raman lines varies from 0.729 to 0.793 in the temperature range (288-208 K) observed on 22 February 2021 in the troposphere. We corrected the 1058 nm Raman signal for the temperature dependence and found around 3 % higher extinction values in the dust layer for the temperature corrected signal. For more detailed information about the temperature dependence of the rotational Raman signals we refer to Veselovskii et al., 2015. In the manuscript we added the following statement (lines 88-93):**

**"The temperature dependent transmission of the oxygen and nitrogen Raman lines varies from 0.729 to 0.793 between 288 and 208 K, which was the maximum and minimum temperature observed in the troposphere on 22 February 2021. The rotational Raman signal at 1058 nm was corrected for the temperature dependence after the cross-talk correction. Within the dust layer, the correction led to around 3% higher extinction values. Detailed calculations of the temperature dependence of rotational Raman lidar signals can be found in Veselovskii et al. (2015)."**

**Thank you for your helpful comment. We started the effort to calculate the temperature dependence of all our interference filters in the other systems, especially for the vibrational-rotational Raman channels and the depolarization channels.**

*Temperature effects can be even more pronounced in the near range (below the full overlap region) where the angle of incidence of the collected light in the IFF is still expected to change with range, especially for biaxial systems. This translates to a shift of the central wavelength of the IFF which in turn could result to temperature dependencies, especially if the IFF central wavelength shifts to a more temperature sensitive region. In the near range this could create overlap-like effects to the signal. Values of the extinction profiles at 1064nm in figures 3 and 4 are not provided in the near range, probably due to overlap issues. Could temperature issues be the reason why the 1064nm extinction profile in figure 3 starts at 2km while the 355nm and 532nm profiles start at 1km? Please add a description explaining whether such issues are present. If they are, please provide some information on how they have been dealt with.*

**This is a valid point and needs further investigation. For further studies, we will investigate the influence of the angle of incidence on the near range signal. For the current publication, we decided to not use the near range.**

**Additionally, the long vertical smoothing length of 2000 m (267 bins) in the case of the 1064 nm extinction on 22 February led to the decision to not show the profiles below 2 km height. At 355 and 532 nm a vertical smoothing of 950 m (127 bins) was sufficient, enabling us to show the profile down to 1 km height. On 3 March 750 m vertical smoothing for all profiles were sufficient because of the longer temporal averaging. It is not stated in the manuscript, but BERTHA is a coaxial system in contrast to our Polly lidars.**

#### Concerning the comparisons with the AERONET inversions

*The lidar and sunphotometer measurements are not simultaneous. They have a time difference that is larger than 11 hours (around 0 UTC for the lidar -middle time -, and 11:35 UTC for the first sunphotometer measurement). The atmosphere could have changed significantly in the meantime. The authors use only the inversion on 23rd of February in their analysis. The retrievals on 22 of February are also available. They should be used to indicate the degree of atmospheric change in Figure 4, Figure 5, and in the discussion. Looking at the AERONET size distributions on 22 and 23 it seems that there are substantial changes. Furthermore, the inversion on 3rd of March is also available. Having provided the degree of atmospheric change in a ~11hour interval from the 22/02 case, the authors could add the 2 inversions on 03/03 in the analysis since the time difference is not far greater (~14 hours).*

**Our aim was to compare the Saharan dust events from lidar and sun photometer observations. We have chosen the closest sun photometer observations of Saharan dust to our lidar measurements. Indeed, there are further photometer observations available for 22 February (until 15:30 UTC). The first slices of Saharan dust arrived at around 16 UTC over Leipzig, the full dust layer at around 19 UTC. The development of the Saharan dust plume can be studied using the continuous observations from PollyNET (<https://polly.tropos.de/calendar/location/1>). We decided to not use the photometer observations from 22 February as they don't measure the Saharan dust plume. However, we calculated the mean of the photometer observations of 23 – 25 February, where the Saharan dust layer was continuously present. The values were similar, but the agreement was a slightly better for the 23 February 2021. Thus, we decided to not use them for the publication. Concerning the results of 3 March 2021, there are no photometer observations of the Saharan dust layer. On 3 March, together with the Saharan dust plume cirrus clouds were present over Leipzig preventing photometer observations. The rain event on 4 March around 6 UTC, removed the dust. Again, no photometer observations of the Saharan dust plume were possible. Again, we used the continuous observations from PollyNET to study the development of the dust layer.**

**Now, it is stated in the paper in a clearer way, why we don't use further photometer measurements for comparison. See lines 163-165 and 190-192:**

**"The AERONET measurements from 22 February 2021 did not capture the Saharan dust event, which arrived at 19 UTC at Leipzig, first slices already at 16 UTC."**

**"Unfortunately, no AERONET observations could be used for comparison. The dust layer was accompanied by extended cirrus layers preventing sun photometer observations and on the next day the precipitation event removed the dust."**

*In addition, an AOD and Angstrom exponent comparison part or section should be*

*included in the manuscript prior to the inversion comparisons in the Discussion as these AERONET products are far more accurate. Extinction and backscatter-related Angstrom profiles are also missing from figures 3 and 4. Please include them as well.*

**Following your suggestion, we introduced a new chapter 4.1 “Backscatter and extinction Ångström exponent” to compare the AOD and EAE to the AERONET observations for 22 February 2021 and the BAE to literature values. Furthermore, we added in Fig. 1 + 3 vertical profiles of the BAE and EAE for the wavelength pairs of 355/532 and 532/1064. These additions make indeed the comparison more complete.**

*Moreover, it should be stressed in the Discussion section that differences with the AERONET retrievals, especially in the lidar ratio, are expected also due to the overlap function of the lidar system. For figure 1 and 3 it is obvious that the extinction profiles are available only above 1km and the 1064nm extinction profile above 2km! This is certainly not negligible, and could affect the comparison, even for the intensive properties since the aerosol type tends to be different inside the PBL. As mentioned above, a comparison with the AERONET AOD and Angstrom values will help quantify the degree of the uncertainties in the overlap region.*

**We improved the manuscript in this point. Firstly, we calculated the AOD from the lidar measurements. For the overlap region, we had to assume the backscatter coefficient times a lidar ratio of 50 sr. To assess the uncertainty, we varied the lidar ratio from 40 to 60 sr. Secondly, we strengthened the discussion about the fine-mode pollution in the boundary layer which certainly affect the columnar photometer observations, especially at the shorter wavelengths. The enhanced lidar ratios in the UV are most probably caused by the influence of the PBL. Whereas the lidar-derived values correspond to the dust layer only.**

#### Concerning the 1064 depolarization ratio profiles

*The 1064nm PLDR profiles have different vertical structure than the 355nm and 532nm profiles which in general show similar patterns. This is especially visible in figure 1 where PLDR maxima and minima are reproduced in both 355nm and 532nm profiles but not in the 1064nm profile. Can the authors explain this behavior? Is this a matter of atmospheric variability since the 1064nm depol. measurements last only for the first 20 minutes. In this case, and serving mainly as a test, would the profiles be more consistent if the first 20 minutes are used so that all three depolarization ratios can be measured at the same time?*

**Yes, you are right. We changed Figure 1 + 3 to show all depolarization ratio profiles at the same time (first 20 min). In Figure 3, we show additionally the PLDR profiles at 355 and 532 nm for the longer measurement as dashed lines. Furthermore, in Table 1 we are just using the depolarization ratios measured simultaneously during the first 20 min.**

#### Technical Comments

*-- Line 111-112: Have the two instruments been intercompared? Please provided references.*

**We have done previous comparisons of BERTHA and Arielle PollyXT measurements, but there are no publications about it. BERTHA was compared to POLIS measurements at Barbados (Haarig et al., 2017) and to another PollyXT for the stratospheric Canadian smoke event (Haarig et al., 2018). We add some more technical details about Arielle PollyXT.**

*-- Line 114, Lines 144-145: Here it is not clear what the reference value is and how the cirrus clouds facilitate the selection of a better value, especially for people outside of the lidar community. The authors should provide a clearer description and provide references.*

**We moved the description of the backscatter calibration to the Instruments section according to a comment by another reviewer (lines 69-75). Therefore, we removed the sentences from the description of the case study. Indeed, we found that the backscatter coefficient in the cirrus cloud was not wavelength independent as we previously assumed. The thick cirrus on 3 March had a backscatter color ratio (1064/532) of 0.88. The cirrus cloud on 22 February was too thin to draw firm conclusions.**

*-- Figure 1, 3, and the tables: How were the mean lidar ratio and Angstrom values calculated? From averaging the lidar ratio profile or by averaging the extensive products (backscatter, extinction) first and then dividing them? If not yet applied, the authors should switch to the later as this leads to less noise.*

**We have done it in both ways and the lidar ratio has not changed. The same vertical averaging was applied for extinction and backscatter coefficients to derive the lidar ratio. In case of the Ångström exponents, the results improved when taking the average of extensive products.**

*-- Figure 4 and 5 on the right: Please add also the time of the lidar measurement in the Figures.*

**Thank you, the time has been added.**

# First triple-wavelength lidar observations of depolarization and extinction-to-backscatter ratios of Saharan dust

Moritz Haarig<sup>1</sup>, Albert Ansmann<sup>1</sup>, Ronny Engelmann<sup>1</sup>, Holger Baars<sup>1</sup>, Carlos Toledano<sup>2</sup>, Benjamin Torres<sup>3</sup>, Dietrich Althausen<sup>1</sup>, Martin Radenz<sup>1</sup>, and Ulla Wandinger<sup>1</sup>

<sup>1</sup>Leibniz Institute for Tropospheric Research, Leipzig, Germany

<sup>2</sup>Atmospheric Optics Group, University of Valladolid, Valladolid, Spain

<sup>3</sup>Laboratoire d'Optique Atmosphérique, Université des Sciences et Technologies de Lille, Villeneuve d'Ascq, France

**Correspondence:** Moritz Haarig (haarig@tropos.de)

**Abstract.** Two layers of Saharan dust observed over Leipzig, Germany, in February and March 2021 were used to provide the first ever lidar measurements of the dust lidar ratio (extinction-to-backscatter ratio) and linear depolarization ratio at all three classical lidar wavelengths (355, 532 and 1064 nm). The pure dust conditions during the first event exhibit lidar ratios of  $47 \pm 8$ ,  $50 \pm 5$  and  $69 \pm 14$  sr and particle linear depolarization ratios of  $0.242 \pm 0.024$ ,  $0.299 \pm 0.018$  and  $0.206 \pm 0.010$  at the wavelengths of 355, 532 and 1064 nm, respectively. The second, slightly polluted dust case shows a similar spectral behavior of the lidar and depolarization ratio with values of the lidar ratio of  $49 \pm 4$ ,  $46 \pm 5$  and  $57 \pm 9$  sr and the depolarization ratio of  $0.174 \pm 0.041$ ,  $0.298 \pm 0.016$  and  $0.242 \pm 0.007$  at 355, 532 and 1064 nm, respectively. The results were compared with Aerosol Robotic Network (AERONET) version 3 inversion solutions and the Generalized Retrieval of Aerosol and Surface Properties (GRASP) at six and seven wavelengths. Both retrieval schemes make use of a **spheroid shape model for mineral dust**. The spectral slope of the lidar ratio from 532 to 1064 nm could be well reproduced by the AERONET and GRASP retrieval schemes. **Higher lidar ratios in the UV were retrieved by AERONET and GRASP. The enhancement was probably caused by the influence of fine-mode pollution particles in the boundary layer which are included in the columnar photometer measurements.** Significant differences between the measured and retrieved wavelength dependence of the particle linear depolarization ratio were found. The potential sources for these uncertainties are discussed.

## 1 Introduction

Triple-wavelength polarization Raman lidar observations of particle depolarization and extinction-to-backscatter ratios are of importance for several reasons. Many lidars (including ceilometers) are standard backscatter lidars and need trustworthy information about the particle extinction-to-backscatter ratio (lidar ratio) in the retrieval of backscatter and extinction profiles and aerosol optical depth (AOD). This is of special importance in the case of the spaceborne CALIPSO lidar (Cloud-Aerosol Lidar and Infrared Pathfinder Satellite Observations) monitoring aerosol and clouds around the globe at 532 and 1064 nm (Omar et al., 2009; Kim et al., 2018). **Besides CALIPSO, the CATS space lidar (Cloud Aerosol Transport System, Yorks et al., 2016) will benefit from lidar ratio measurements at 1064 nm, as well as possible future space missions operating a backscatter lidar at 1064 nm.**

Triple-wavelength lidar measurements are also **important** for aerosol typing efforts that make use of spectrally resolved intensive aerosol parameters such as the linear depolarization ratio, lidar ratio, as well as the extinction and backscatter-related Ångström exponents for all climate-relevant aerosol types like marine aerosol, dust, smoke, volcanic ash, and haze particles (Burton et al., 2012; Groß et al., 2013; Baars et al., 2017). In this respect, our measurements will contribute to these aerosol typing efforts by adding new information on dust lidar and depolarization ratios at 1064 nm.

The most important aspect of triple-wavelength lidar observations of dust depolarization and lidar ratios is, however, that such measurements at all three classical aerosol lidar wavelengths (355, 532, and 1064 nm) are required to improve optical models applied to simulate the optical properties of aerosol particles as a function of size distribution, shape characteristics, and chemical composition. Especially in the case of mineral dust there is a strong request for those lidar observations to improve the applied particle shape parameterization. **The optical properties of dust strongly depend on particle shape (depolarization ratio), size and mineralogy (lidar ratio).** These data, presented here, will support the validation of shape models for the irregularly shaped dust particles.

Modeling of dust optical properties is especially challenging for the 180° backscattering direction. Complex dust shape models were developed to improve the agreement between lidar observations and respective simulation results (Gasteiger et al., 2011; Kemppinen et al., 2015; Saito et al., 2021). The spheroidal shape model is widely used (Dubovik et al., 2006), e.g., in the analysis of Aerosol Robotic Network (AERONET, Holben et al., 1998) sun and sky radiometer measurements to obtain the inversion products which include the lidar ratio and the particle linear depolarization ratio at four wavelengths between 440 and 1020 nm. The photometer retrieval products were compared with lidar measurements of desert dust (Teschke et al., 2009; Müller et al., 2010, 2012; Noh et al., 2017; Shin et al., 2018; Toledano et al., 2019) and **discrepancies were found**.

Triple-wavelength lidar observations of the depolarization ratio are available since 2013 (Burton et al., 2015; Haarig et al., 2017). However, direct observations of the lidar ratio at all three lidar wavelengths are missing as was stated in Shin et al. (2018). Haarig et al. (2016) showed, for the first time, directly measured vertical profiles of the 1064 nm extinction coefficient. Since then, we used the triple-wavelength Raman lidar approach to characterize cirrus (Haarig et al., 2016) and wildfire smoke (Haarig et al., 2018) in terms of backscatter, extinction, lidar ratio, and depolarization ratio at 355, 532 and 1064 nm. Now, we present two case studies of pure dust and polluted dust outbreaks towards central Europe which occurred in February and March 2021. The first Saharan dust plume extended from the ground up to 8 km height and reached our station in Leipzig, Germany, in less than 2 days (around 36 hours) after emission. The fast transport process at great heights prevented mixing with anthropogenic pollution. The second dust outbreak occurred one week later. The dust spent more time over Europe (3–4 days of transport) and the dust plume mixed with European haze.

The article is structured as follows. After a short description of the lidar system and the additional, new option to measure extinction coefficients at 1064 nm in Sect. 2, the two observed dust cases are presented in Sect. 3. The discussion in Sect. 4 focuses on **the Ångström exponents and** the spectral dependence of the depolarization ratio and lidar ratio. We use the opportunity to compare our results with AERONET v3 inversion results as well as with products obtained by applying the Generalized Retrieval of Aerosol and Surface Properties (GRASP) technique (Dubovik et al., 2014; Torres et al., 2017; Dubovik et al., 2021), available for the same dust event in February 2021.

## 2 Instrumentation

60 For the present study two lidars and an AEROENT sun photometer at the Leibniz Institute for Tropospheric Research (TRO-POS) in Leipzig (51.35°N, 12.43°E), Germany, were used.

The multiwavelength polarization Raman lidar BERTHA (Backscatter Extinction lidar-Ratio Temperature Humidity profiling Apparatus, Haarig et al., 2017) provides the backscatter coefficient, extinction coefficient and depolarization ratio at 355, 532 and 1064 nm (3+3+3 configuration). However, it can not measure the depolarization ratio and the extinction coefficient  
65 at 1064 nm at the same time. A couple of minutes are necessary to switch the NIR setup from depolarization to extinction measurements.

**The radiometric or Rayleigh calibration of the signals was done in clear air which is at 1064 nm a challenging task. At 1064 nm the elastic return signal from molecules is 81 times and 16 times smaller than for 355 and 532 nm, respectively. The reference height for the 1064 nm signal was set some hundreds of meters above the dust layer top height for a**  
70 **sufficient strong molecular signal. On 3 March 2021 (Sect. 3.2) a thick cirrus cloud was present, which could be used to check the Rayleigh calibration. A backscatter color ratio (1064/532) of 0.88 was observed, which is in line with observations by Vaughan et al. (2010) who reported values of  $1.01 \pm 0.25$  in cirrus clouds. On 22 February 2021 (Sect. 3.1), the cirrus clouds were too thin to check the calibration.**

The extinction coefficients at 355 and 532 nm were derived by using the vibrational-rotational Raman channels at 387 and  
75 607 nm, respectively. The rotational Raman technique (Whiteman, 2003a, b; Veselovskii et al., 2015; Haarig et al., 2016; Ortiz-Amezcu et al., 2020) was applied to provide measurements of the extinction coefficient at 1064 nm. A detailed description of rotational Raman technique implemented in BERTHA can be found in Haarig et al. (2016). The Raman channel is equipped with an interference filter centered at 1058 nm (Alluxa, Santa Rosa, CA, <http://www.alluxa.com>). The transmission band is from 1053 to 1062 nm with a transmission >90% in this wavelength range. The filter bandwidth of 9 nm restricts the  
80 1058 nm Raman observations to nighttime hours. For the laser wavelength of 1064.14 nm, the transmission is specified to be 0.005%. For a better suppression of the transmitted radiation at 1064 nm two identical 1058 nm interference filters are used in front of the photomultiplier tube (photocounting, R3236 from Hamamatsu, Japan). **However, still some cross-talk from the elastic signal at 1064 nm was present in the Raman channel. The enhanced signal received from the liquid clouds on 22 February 2021 (Section 3.1) was used to estimate the cross-talk factor of  $0.0175 \pm 0.0005$ . For the further analysis, the**  
85 **elastic signal at 1064 nm multiplied by the cross-talk factor was subtracted from the Raman signal at 1058 nm to correct for the cross talk. In this simple approach, the cross talk is assumed to be temperature independent. The temperature dependent transmission of the oxygen and nitrogen Raman lines varies from 0.729 to 0.793 between 288 and 208 K, which was the maximum and minimum temperature observed in the troposphere on 22 February 2021. The rotational Raman signal at 1058 nm was corrected for the temperature dependence after the cross-talk correction. Within the dust**  
90 **layer, the correction led to around 3% higher extinction values. Detailed calculations of the temperature dependence of rotational Raman lidar signals can be found in Veselovskii et al. (2015).**

In BERTHA, linearly polarized laser pulses are transmitted into the atmosphere and the so-called co-polarized and cross-

polarized signal components are measured. “Co” and “cross” denote the planes of polarization parallel and orthogonal to the plane of linear polarization of the transmitted laser pulses, respectively. In the case of spherical droplets, wet marine and small haze particles, the polarization state of the laser pulse radiation is preserved during the backscattering process and the particle linear depolarization ratio (PLDR), computed from the ratio of the cross-polarized to the co-polarized signal component, is close to zero. In the case of irregularly shaped dust particles, depolarization takes place during the backscattering event and the PLDR values are close to 0.3 at 532 nm (Freudenthaler et al., 2009; Haarig et al., 2017). The calibration of the polarization-sensitive channels at all three wavelengths makes use of the so-called  $\Delta 90^\circ$  method (Freudenthaler, 2016). The error estimation for the BERTHA system is described in Haarig et al. (2017).

**The second lidar was the Polly<sup>XT</sup> (Engelmann et al., 2016), . It is described below. The second lidar used in the present study is a Polly<sup>XT</sup> (POrtabLe Lidar sYstem, neXT generation, Engelmann et al., 2016) which is usually used for ship-borne observations (Engelmann et al., 2021) within OCEANET Atmosphere. It is a Raman polarization lidar, measuring the backscatter coefficient at 355, 532 and 1064 nm, the extinction coefficient at 355 and 532 nm (vibrational-rotational Raman) and the depolarization ratio at 355 and 532 nm. Additionally, near range channels at 355, 387, 532 and 607 nm provide information at lower altitudes and the dual-field-of-view polarization technique (Jimenez et al., 2020) is implemented to study liquid clouds. The Polly<sup>XT</sup> was operated several meters apart from the BERTHA instrument.**

A CIMEL sun-sky photometer of AEROENT (Holben et al., 1998) is operated at Leipzig since 2000. Currently, only level 1.5 data are available for February and March 2021, although the data already passed all quality criteria, including cloud screening and operational checks (Giles et al., 2019). **Besides the standard AERONET data analysis procedure (Dubovik and King, 2000; Dubovik et al., 2006; Sinyuk et al., 2020), the related GRASP retrieval scheme was applied (Dubovik et al., 2014; Torres et al., 2017; Toledano et al., 2019; Dubovik et al., 2021). GRASP is based on a similar approach as the standard AERONET retrieval (Dubovik and King, 2000), but using optical information (AOD and radiances) at the wavelengths of 380, 500 and 1640 nm additionally. From both algorithms the column lidar ratios and depolarization ratios at several wavelengths were retrieved.**

### 3 Observations

Two case studies of triple-wavelength depolarization ratio and lidar ratio observations of Saharan dust from late winter 2021 will be shown. Pure dust conditions were observed on 22–23 February 2021, while mixed pollution-dust conditions prevailed on 3 March 2021.

#### 120 3.1 First dust outbreak: 22–23 February 2021

Huge amounts of mineral dust were emitted from western Saharan regions around and before 21 February 2021. The dust plumes were directly transported towards central Europe and reached Leipzig in less than 2 days (around 36 hours) after emission as shown by the HYSPLIT (HYbrid Single-Particle Lagrangian Integrated Trajectory, Stein et al., 2015) backward trajectories in Figure 1b. More detailed source attributions indicate the Sahara as main source region for the lofted layers (see

Fig. 2). Below 3 km height, aerosol from continental Europe were probably mixed into the Saharan dust plumes. In the night of 22–23 February 2021, the dust plumes reached from the ground up to 8 km height. Saharan dust was transported towards central Europe continuously from the evening of 22 February till the morning of 26 February 2021. **The whole dust event was studied using the continuous observation of the Polly<sup>XT</sup> lidar (polly.tropos.de/calendar/location/1, Baars et al., 2016).** The transport pattern were similar to the dust outbreak in October 2001 described in Ansmann et al. (2003), which was measured by the entire EARLINET community (European Aerosol Research Lidar NETwork, now part of the Aerosol, Clouds and Trace Gases Research Infrastructure, ACTRIS, Pappalardo et al., 2014).

The lidar measurements are presented in Fig. 1. The time-height plot (Fig. 1a) of the cross-polarized and range-corrected signal at 532 nm provides an overview of the dust conditions observed with the BERTHA lidar system. During the first 20 min the system was in the configuration to measure the depolarization ratio at 1064 nm. Then, the configuration was switched to permit measurements of the extinction coefficient at 1064 nm for the next 2 h 15 min. Some clouds were forming in the humid dust layer at around 4 km height, indicated by strong backscatter signals (dark red) and the attenuation of laser radiation above the cloud layers. The cloud-containing profiles were excluded from the calculation of the dust optical properties, **but used for the estimation of the cross-talk correction.** The signals at 355 nm of the BERTHA lidar were very weak during that night. **In fact, neutral density filters in front of the UV channels were not adapted to the strongly reduced power of the UV laser.** Therefore, the optical properties at 355 nm were taken from the nearby Polly<sup>XT</sup> measurements. Additionally, the optical properties at 532 nm measured with the Polly<sup>XT</sup> are shown in Fig. 1c–f. The profiles at 532 nm (green lines) from the different lidar observations agree well.

**In the dust layer (main part 3–5 km height, extending up to 8 km height), no wavelength dependence for the backscatter coefficient between 355 and 532 nm was found (backscatter Ångström exponent BAE =  $0.040 \pm 0.524$ ). The backscatter coefficient at 1064 nm was around 80% of the value at 532 nm within the dust layer.** The extinction coefficient exceeded  $100 \text{ Mm}^{-1}$  at around 3.5 km height at all three wavelengths. **The total AOD was approximately 0.45 at 532 nm during that night. The extinction Ångström exponent (EAE, Fig. 1e) were vertically constant within the dust layer and close to zero, but slightly negative.** The lidar ratio (Fig. 1f) derived in the strongest part of the dust layer (3–5 km height), increased with wavelength from  $47 \pm 8$  sr at 355 nm, to  $50 \pm 5$  sr at 532 nm and  $69 \pm 14$  sr at 1064 nm. The particle linear depolarization ratio PLDR at 532 nm of up to  $0.30 \pm 0.02$  (3–5 km layer mean and systematic uncertainty) indicates pure dust conditions (Freudenthaler et al., 2009). The PLDR decreases towards 355 nm ( $0.242 \pm 0.024$ ) and 1064 nm ( $0.206 \pm 0.010$ ). **In order to compare simultaneous observations of the PLDR the values are reported for the first 20 min (22:12–22:32 UTC) when the 1064 nm channels measured the depolarization ratio. Whereas all other intensive optical properties were measured from 22:45–01:02 UTC. The depolarization ratios for the later period were nearly the same ( $0.256 \pm 0.025$  and  $0.298 \pm 0.017$  at 355 and 532 nm, respectively).** A summary of the intensive optical properties measured in the night of 22–23 February 2021 can be found in Table 1.

The AERONET version 3 inversion results for the lidar ratio and PLDR (five separate observations) performed on 23 February 2021 between 11:35 and 14:49 UTC will be compared with the lidar observations in Section 4. The AERONET measurement period is indicated in Fig. 2. The continuous observations of the Polly<sup>XT</sup> and the source attribution for 23 February 2021 in Fig.

160 2 reveal that the same Saharan dust layer was present during the nighttime lidar measurements and the daytime AERONET observations. **At lower heights, Europe is indicated besides the Sahara as a potential source region. The AERONET measurements from 22 February 2021 did not capture the Saharan dust event, which arrived at 19 UTC at Leipzig, first slices already at 16 UTC.**

### 3.2 Second dust outbreak: 3 March 2021

165 A second dust outbreak occurred one week later on 3 March 2021. Travel time was 3–4 days from the Sahara to Leipzig via Spain and France as indicated by the HYSPLIT backward trajectories in Fig 3b. **On 3 March 2021, the dust plume arrived around 10 UTC over Leipzig with some cirrus clouds above. In the night, the dust plume reached its largest vertical extend. Some clouds were formed within the dust layer. In the morning of 4 March, around 6 UTC, precipitation started and washed out the dust. The development of the dust plume over Leipzig was studied using the continuous observation of PollyNET (<https://polly.tropos.de/calendar/location/1>, Baars et al., 2016).**

170 This time the BERTHA lidar was fully operational at all three wavelengths so that also the optical properties at 355 nm could be used. The lidar observations are shown in Fig. 3. The dust layer extended up to 5 km in the beginning, later on the dust plume descended down to 4 km height. During the first 20 min, the lidar was **configured** to measure the depolarization ratio at 1064 nm (3+2+3 configuration). The process of changing the interference and polarization filters was optimized so  
175 that 7 min later the extinction measurement at 1064 nm could be started (3+3+2 configuration). **To avoid too strong vertical smoothing for the extinction coefficient at 1064 nm compared to the previous case,** signal profiles collected over 3 h 20 min (21:11–00:32 UTC) were averaged. The main dust layer extended from 1.5–4 km height and provided vertically homogeneous conditions for averaging. The profiles of the extinction coefficients and lidar ratios in Fig. 3d and f are shown for a sliding average window length of 742.5 m.

180 **The AOD was 0.41 at 355 nm, 0.37 at 532 nm and 0.34 at 1064 nm.** The lidar ratio in the center of the dust layer (2.0–3.5 km height) at 1064 nm ( $57 \pm 9$  sr) was slightly higher than at 532 nm ( $46 \pm 5$  sr). The slight increase in the lidar ratio at 355 nm ( $49 \pm 4$  sr) compared to 532 nm could be an indication for pollution mixed into the dust layer.

**The depolarization ratios (Fig. 3g) were measured from 20:44–21:04 UTC. The dashed lines indicate the depolarization ratios at 355 and 532 nm measured at the same time as the other optical properties (21:11–00:32 UTC).** The dust  
185 layer showed a larger vertical extent up to 5 km height during the first shorter measurement period. Especially, the PLDR at 355 nm was significantly reduced ( $0.174 \pm 0.041$ ) compared to the previous case with pure dust conditions. The longer transport over Europe obviously caused the weak mixing with anthropogenic pollution. A summary of the intensive optical properties measured on 3 March 2021 can be found in Table 1. **Unfortunately, no AERONET observations could be used for comparison. The dust layer was accompanied by extended cirrus layers preventing sun photometer observations**  
190 **and on the next day the precipitation event removed the dust.**

## 4 Discussion

### 4.1 Backscatter and extinction Ångström exponent

The aerosol optical depth from the lidar measurement in the night of 22–23 February 2021 was  $0.48 \pm 0.03$  at 355 nm,  $0.45 \pm 0.03$  at 532 nm and  $0.45 \pm 0.03$  at 1064 nm. Below the dust layer, the backscatter coefficient times a lidar ratio of 50 sr was used to estimate the extinction coefficient. The uncertainty was estimated by varying the lidar ratio  $\pm 10$  sr. Figure 2 shows a slight decrease in the dust plume height till the next morning where the AERONET observations were performed. Slightly lower AODs of 0.43 at 340 nm, 0.42 at 500 nm and 0.36 at 1020 nm were measured by the photometer.

The intensive optical properties such as the extinction Ångström exponent (EAE) are given in Table 1. The lidar derived EAE for the three wavelength are all negative, but close to zero ranging between  $-0.005$  (355/532) and  $-0.098$  (355/1064). Negative EAE (355/532) down to  $-0.2$  were observed for Saharan dust in Senegal (Veselovskii et al., 2016), where the EAE of Saharan dust accumulated in the interval  $-0.2$  to  $0.2$ .

The AERONET observations from the early morning of 23 February 2021 showed an Ångström exponent calculated from the AOD at 440 and 870 nm of  $0.217 \pm 0.039$  and for the wavelengths 380/500 of  $0.124 \pm 0.073$ . The greater and positive Ångström exponent of the AERONET observations might be influenced by the small urban haze particles in the wintertime planetary boundary layer. The lidar data did not include these urban haze effects. Considering the whole column, AOD Ångström exponents from the lidar observations of  $0.155 \pm 0.177$  (355/532),  $0.008 \pm 0.021$  (532/1064) and  $0.062 \pm 0.015$  (355/1064) were obtained. The AOD Ångström exponent in the UV–VIS range agrees within the uncertainties, whereas the higher AOD at 1064 nm led to lower Ångström exponents from the lidar, probably due to an overestimation of the AOD at 1064 nm in the boundary layer.

The backscatter Ångström exponents (BAE) are provided in Table 1. The backscatter coefficients at 355 and 532 nm were almost the same ( $100 \pm 5\%$ ), whereas values at 1064 nm were lower (here 79% of the value at 532 nm) as found in other observations of mineral dust (Veselovskii et al., 2016; Hofer et al., 2020). This behavior is expressed in the BAE (532/1064) of 0.35, and at Barbados of 0.47. Liu et al. (2008) reported CALIPSO observations of the backscatter color ratios (1064/532) of 0.72–0.75 in Saharan dust. This translates to an average BAE of 0.44, which is comparable to the value observed in the Saharan air layer at Barbados.

### 4.2 Spectral dependence of the lidar ratio

The discussion of the spectral behavior of the lidar ratio of Saharan dust is based on the two presented case studies from Leipzig and observations at Barbados during the Saharan Aerosol Long-range Transport and Aerosol–Cloud–Interaction Experiment (SALTRACE, Weinzierl et al., 2017). The BERTHA lidar system at Barbados ( $13^\circ\text{N}$ ,  $59^\circ\text{W}$ ) measured the Saharan dust after long-range transport over 5000–8000 km across the Atlantic Ocean in three intensive campaigns in 2013 and 2014 (Haarig et al., 2017). The statistics of the lidar ratio at 355 and 532 nm and the Ångström exponents based on 22 SALTRACE measurement cases are reported in the present publication for the first time (Table 1). During the SALTRACE campaigns,

the rotational Raman technique applied to measure the extinction at 1064 nm was not implemented in the BERTHA lidar.  
 225 However, the lidar ratio at 1064 nm could be estimated for one intense dust event with very homogeneous dust conditions  
 observed on 20 June 2014. Here, the column-integrated backscatter coefficient at 1064 nm in the dust layer after sunset and the  
 AOD at 1020 nm (from AERONET observations) before sunset were used as described in Mamouri and Ansmann (2017). An  
 AOD contribution of 0.035 for marine aerosol below the dust layer was subtracted to obtain the pure dust value for the lidar  
 ratio estimate. This method led to a dust lidar ratio of  $67 \pm 15$  sr at 1064 nm.

230 The spectral dependence of the lidar ratio of Saharan dust is shown in Fig. 4a. The lidar ratio does not change significantly  
 in the wavelength range of 355 to 532 nm. In the case of Saharan dust, this behavior was observed in numerous studies (e.g.,  
 Tesche et al., 2011; Groß et al., 2015). Some studies however, point to higher values in the UV (Mattis et al., 2002). Veselovskii  
 et al. (2020) observed cases with the same lidar ratio at 355 and 532 nm and cases with higher lidar ratios at 355 nm. The ratio  
 of lidar ratios for 355 and 532 nm is an indicator of the imaginary refractive index enhancement in the UV depending on the  
 235 mineralogical composition of the dust particles (Veselovskii et al., 2020).

The present study **indicates** an increase of the lidar ratio from 532 to 1064 nm. As mentioned, the reason is the lower particle  
 backscatter coefficient  $\beta$  at 1064 nm compared to the one at 532 nm so that the backscatter Ångström exponent  $BAE$ , defined  
 as  $BAE_{\lambda_i, \lambda_j} = \ln(\beta_i / \beta_j) / \ln(\lambda_j / \lambda_i)$  in the spectral range from wavelength  $\lambda_i$  to  $\lambda_j$ , is positive. The extinction coefficient  $\alpha$   
 usually does not show a significant wavelength dependence so that the respective extinction Ångström exponent  $EAE$  is close  
 240 to zero as **shown in Fig. 1e and 3e**. According to Ansmann et al. (2002), the Ångström exponent  $SAE$  for the lidar ratio  $S$ ,  
 given by

$$SAE = EAE - BAE, \quad (1)$$

is then negative. This relationship (1) holds within the uncertainties for the intensive optical properties provided in Table 1.  
 The ratios of the lidar ratios given in Table 1 quantify the increase of the lidar ratio from 532 to 1064 nm. We found around **24–**  
 245 **38%** higher values for the lidar ratio at 1064 nm compared to 532 nm. **A similar increase (27–34%) in lidar ratio from 532**  
**to 1064 nm was observed from three early CALIPSO measurements of Saharan dust transported from Africa across the**  
**Atlantic (Liu et al., 2008).** Combined sun photometer and lidar observations during the Saharan Mineral Dust Experiments  
 (SAMUM) in Morocco led to the conclusion that the lidar ratio is almost independent of wavelength with values of  $55 \pm 5$  sr,  
 $56 \pm 5$  sr, and  $59 \pm 7$  sr at 355, 532, 1064 nm, respectively (Tesche et al., 2009). The authors used the extinction Ångström  
 250 exponent (for the 500–1020 nm wavelength range) from sun photometer observations to transfer the extinction profile from  
 532 to 1064 nm and calculate the lidar ratio at 1064 nm using the corresponding backscatter profile in addition. **In contrast to**  
**those measurements for freshly emitted dust close to its source**, we found now lidar ratio values of  $47 \pm 8$  sr,  $50 \pm 5$  sr, and  
 $69 \pm 14$  sr for the three wavelengths **after a dust transport of less than 2 days**.

The spectral dependence of the lidar ratio measured with lidar and retrieved from the AERONET observations is compared in  
 255 Fig. 4b. The AERONET data base (AERONET, 2021) provides AOD values at 440, 675, 870 and 1020 nm together with further  
 products such as lidar ratio and linear depolarization ratio. The lidar ratio and particle linear depolarization ratio are retrieved  
 by means of the AERONET v3 inversion algorithm (Dubovik and King, 2000; Giles et al., 2019; Sinyuk et al., 2020) which

assumes a spheroidal dust particle shape (Dubovik et al., 2006). Additionally to the standard four wavelengths, the inversion was performed using the GRASP algorithm at six wavelengths (plus 500 and 1640 nm) and seven wavelengths (plus 380 nm, 260 Dubovik et al., 2014; Torres et al., 2017; Dubovik et al., 2021). For the mean values the data were filtered in the way that the residual is <10% of the inversion retrieval. **Since radiance measurements were included in the GRASP data analysis the refractive index and the sphericity are not pre-set and are retrieved following the same strategy as AERONET but with the extra information provided by the use of more wavelengths.** A comparison of the lidar observations with the respective AERONET v3 inversion products was only possible on 22–23 February 2021.

265 The spectral slope of the lidar ratio is well reproduced by the AERONET observations for the spectral range from 675 to 1020 nm. The **seven-wavelength** mean values show exactly the same spectral slope as obtained by the lidar observations. The retrieved lidar ratios at 440 nm using the standard AERONET algorithm indicate **higher values** of the lidar ratio in the UV range. The GRASP retrieval at 440 nm shows a much better agreement with the lidar observations. The increase of the lidar ratio at 380 nm (seven-wavelength retrieval) points again to **higher values** of the lidar ratio in the UV range. The enhanced 270 lidar ratios in the UV retrieved by AERONET were already discussed by Shin et al. (2018): The **increase** of the imaginary part of the refractive index at 440 nm compared to 675 nm is too strong in the AERONET inversion procedure, resulting in too high lidar ratios at 440 nm. **However, in the present case the explanation might be simpler. The sun photometer measures columnar values whereas the profile measurement of lidar permits to focus on the dust layer only. The fine-mode aerosol pollution of the wintertime boundary layer at Leipzig can significantly influence the AERONET lidar-ratio products,** 275 **especially at the shorter wavelengths of 440 and 380 nm. Therefore, the columnar lidar ratio should increase towards the UV.**

As mentioned, the refractive index depends on the mineralogical composition of dust particles and this changes for different dust source regions. Schuster et al. (2012) investigated the variation of the lidar ratio obtained from AERONET observations for different deserts around the Earth and found significant differences. The highest lidar ratios were found for the western 280 Sahara, lower values for Asian deserts. The global coverage of AERONET sun photometers is a big advantage. However, the retrievals should be checked against Raman or high spectral resolution lidar (HSRL) observations as has been started by Shin et al. (2018), **ideally in a desert, where no other aerosol type contributes to the columnar values. The present study indicates a good agreement of the lidar ratio in the spectral range of 675 to 1020 nm.**

### 4.3 Spectral dependence of the depolarization ratio

285 The spectral dependence of the particle linear depolarization ratio of Saharan dust is shown in Fig. 5a. The results of the two presented case studies are set into context with previous triple-wavelength depolarization ratio observations. The observations of Saharan dust close to its source in Morocco (Freudenthaler et al., 2009) and after long-range transport towards Barbados (Haarig et al., 2017) and North America (Burton et al., 2015) show a consistent spectral slope. The PLDR increases in the wavelength range from 355 to 532 nm and then decreases again towards the wavelength of 1064 nm.

290 Table 1 **provides the values for the two presented cases studies at Leipzig and the SALTRACE observations.** The table includes the ratio of PLDR for the wavelength pairs of 355 and 532 nm and of 1064 and 532 nm. The depolarization ratio at

355 nm was very low on 3 March 2021 ( $0.174 \pm 0.041$ ) and probably reflects the impact of aerosol pollution mixed into the dust layers. The small and spherical pollution particles affect the backscattering at shorter wavelengths more effectively than at the longer wavelengths. For pure Saharan dust (22–23 February 2021, Barbados, Morocco), the PLDR at 355 nm reached around  
295 **80–90%** of the value at 532 nm. The PLDR at 1064 nm depends on the amount of rather large dust particles in the observed layer and thus is very sensitive to the travel duration (and the corresponding removal of large particles). The decrease of the PLDR with wavelength in the range from 532 to 1064 nm is expressed by PLDR ratios of 0.69–0.83 for Saharan dust after long-range transport (Table 1).

The spectral slope of the PLDR is not an unique feature of Saharan dust. Hu et al. (2020) observed the same spectral dependence  
300 but with generally higher values for dust from the Taklamakan desert in western China. **Observations were performed** very close to the main dust sources, and thus with an enhanced fraction of very large dust particles. The same behavior was found for locally emitted dust in the Southwest of the United States (Burton et al., 2015). The large dust particles of the freshly emitted dust were still present in the air during the lidar observations and produced significantly higher depolarization ratios of  $0.38 \pm 0.01$  at 1064 nm.

305 The spectral dependence of the PLDR in Fig. 5b derived from the sun and sky photometer observations is very different from the respective lidar observations of the PLDR spectral behavior. The lidar measurements of desert dust generally show a pronounced maximum of the depolarization ratio **in the visible wavelength range**. This is not visible in the AERONET spectra. By using the GRASP method (including the use of optical data measured at 1640 nm, not shown in the figure) leads to a decrease of the PLDR with wavelength, starting already at 1020 nm. However, the PLDR in the NIR is still overestimated for  
310 the presented case, in which a PLDR of  $0.206 \pm 0.010$  at 1064 nm was measured. **Compared to previous observations of the PLDR at 1064 nm (Fig. 5), the value is quite low.** The six- and seven-wavelength GRASP retrievals lead to a better agreement in the NIR, but underestimates the depolarization ratio at the shorter wavelengths. Previous comparisons of lidar-measured and AERONET-retrieved depolarization ratios pointed out that the spheroidal model used for the AERONET inversions fails to predict the spectral slope of the PLDR (Noh et al., 2017; Shin et al., 2018). Only Toledano et al. (2019) was able to obtain the  
315 spectral slope as observed with polarization lidar systems by using the six-wavelength sun photometer retrieval for Saharan dust observations on Barbados during SALTRACE. In their study, the PLDR increases from  $0.277 \pm 0.040$  at 440 nm to  $0.282 \pm 0.031$  at 675 nm and then decreases again to  $0.259 \pm 0.030$  at 1020 nm. A further decrease was retrieved for the wavelength of 1640 nm ( $0.191 \pm 0.028$ ). Again, the boundary-layer fine-mode pollution (over Leipzig) **influenced** the AERONET retrievals and may lead to smaller AERONET depolarization ratio values than observed with lidar in the lofted dust layer. However, the significant  
320 discrepancies between the AERONET and the lidar observations in the 532–1064 nm spectral range remain an unsolved issue and seem to be related to the used spheroidal shape model in the AERONET and GRASP retrieval schemes.

## 5 Conclusions

We presented, for the first time, measurements of the dust lidar ratio at the main aerosol lidar wavelengths of 355, 532 and 1064 nm. Together with the depolarization ratio at these wavelengths, we demonstrated the unique potential of a triple-

325 wavelength polarization Raman lidar to permit so-called 3+3+3 profiling (3 backscatter coefficients, 3 extinction coefficients,  
3 depolarization ratios). Two case studies of Saharan dust over central Europe were presented, one for pure dust conditions and  
another case with slightly polluted dust. The measurement of the depolarization ratio and lidar ratio at three wavelengths from  
355 to 1064 nm provides an improved, more complete set of constraints in modeling efforts to develop a realistic dust particle  
330 particles may be possible by considering the spectral information of the lidar ratio at 355, 532 and 1064 nm. Nevertheless,  
realistic assumptions on the imaginary part of the refractive index are required. Good measurements of the refractive index  
are important to allow for an accurate computation of the spectral slope of the lidar ratio in the wavelength range from 355 to  
1064 nm.

**To derive the extinction coefficient at 1064 nm from backscatter lidars and ceilometers, realistic estimates of the lidar  
335 ratio at this wavelength are necessary. We presented now the first direct measurements of the lidar ratio at 1064 nm for  
Saharan dust.** It would be desirable, in this context, to perform such triple-wavelength lidar measurements in very different  
desert regions of the world. Middle East and central Asian dust show, e.g., lower lidar ratios, especially at 532 nm, as presented  
here (Hofer et al., 2020). We found lidar ratios of  $47\pm 8$ ,  $50\pm 5$  and  $69\pm 14$  sr at 355, 532 and 1064 nm, respectively, for pure  
dust conditions, and respective lidar ratios of  **$49\pm 4$ ,  $46\pm 5$  and  $57\pm 9$  sr** for slightly polluted dust. In central Asia, pure dust  
340 lidar ratios were on average  $43\pm 3$  and  $39\pm 4$  sr at 355 and 532 nm, respectively (Hofer et al., 2020).

**The lidar ratio at 532 and 1064 nm are important input parameters for the CALIPSO lidar data analysis to derive the  
respective extinction coefficients at these two wavelengths (Omar et al., 2009). In the retrieval algorithm version 4, lidar  
ratios of  $44\pm 9$  sr at 532 nm and  $44\pm 13$  sr at 1064 nm are used for the aerosol type of pure dust (Kim et al., 2018). Based  
on our results, we would suggest to use a higher value at 1064 nm compared to 532 nm.**

345 The comparison with AERONET v3 inversion products revealed that the spectral dependence of PLDR was not matched by the  
AERONET results. The GRASP computations based on the optical information (AOD, radiances) measured at six and seven  
wavelengths improved the agreement, but lead to overall lower values. **In contrast to lidar systems which are only operating  
at 180°backscatter angle, this angle is not accessible for the photometer. Therefore, the photometer retrievals are not  
optimized for this special angle. Joint inversions of the lidar and photometer data as done in Lopatin et al. (2021) would  
350 be desirable.**

**The lidar measurements could confirm the spectral slope of the lidar ratio from the VIS towards the NIR retrieved by  
the AERONET and GRASP data analysis. The fine-mode pollution aerosol in the boundary layer led to higher lidar  
ratios in the UV from the columnar photometer measurements compared to the Saharan dust observations with lidar.**  
We may conclude that an appropriate particle shape model for the non-spherical dust particles is still missing. The spheroidal  
355 shape model (Dubovik et al., 2006) has proven to be useful to derive volume and surface area concentrations from sky radiance  
and AOD observations at several wavelengths **even for non-spherical dust particles**. However, this shape model is not able  
to reproduce the spectral slope of the particle linear depolarization ratio **with a maximum at 532 nm** measured with lidar  
at the 180°backscatter direction. Complex particle-shape models (Gasteiger et al., 2011; Kemppinen et al., 2015; Saito et al.,  
2021) are computationally expensive. Nevertheless, they may lead to a more realistic representation of the non-spherical dust

360 particles **for the 180° backscatter direction** in the models.

As a final remark, it would be helpful, and a good addition to field observations, if laboratory measurements of the depolarization and lidar ratios at all three wavelengths (in the 180° backscatter direction) could be realized for well defined size fractions of real dust particles with real irregular shape characteristics. An effort was already started by Miffre et al. (2016).

365 *Data availability.* The BERTHA lidar data can be obtained upon request **from Moritz Haarig (haarig@tropos.de)**. The Polly<sup>XT</sup> data are available in the PollyNET data base (<https://polly.tropos.de/>). (PollyNET, 2021). The AERONET data are available via the AERONET web page (<https://aeronet.gsfc.nasa.gov/>) under the site 'Leipzig' (AERONET, 2021).

*Author contributions.* MH performed the lidar measurements, analyzed the data and wrote the manuscript. AA provided advise and valuable comments on the manuscript. RE supported the rotational Raman measurements. HB provided the Polly<sup>XT</sup> results. DA provided technical  
370 support for the BERTHA lidar system. CT and BT provided the six and seven wavelength GRASP retrieval. MR did the source appointment analysis. UW provided comments on light scattering.

*Competing interests.* The authors declare that they have no conflict of interest.

## References

- AERONET: Aerosol Robotic Network aerosol data base, <https://aeronet.gsfc.nasa.gov/>, 2021.
- 375 Ansmann, A., Wagner, F., Müller, D., Althausen, D., Herber, A., von Hoyningen-Huene, W., and Wandinger, U.: European pollution outbreaks during ACE 2: Optical particle properties inferred from multiwavelength lidar and star-Sun photometry, *Journal of Geophysical Research: Atmospheres*, 107, AAC 8–1–AAC 8–14, <https://doi.org/10.1029/2001JD001109>, 2002.
- Ansmann, A., Bösenberg, J., Chaikovsky, A., Comerón, A., Eckhardt, S., Eixmann, R., Freudenthaler, V., Ginoux, P., Komguem, L., Linné, H., Márquez, M. A. L., Matthias, V., Mattis, I., Mitev, V., Müller, D., Music, S., Nickovic, S., Pelon, J., Sauvage, L., Sobolewsky, P., Srivastava, M. K., Stohl, A., Torres, O., Vaughan, G., Wandinger, U., and Wiegner, M.: Long-range transport of Saharan dust to northern Europe: The 11–16 October 2001 outbreak observed with EARLINET, *Journal of Geophysical Research: Atmospheres*, 108, 4783, <https://doi.org/10.1029/2003JD003757>, 2003.
- 380 Baars, H., Kanitz, T., Engelmann, R., Althausen, D., Heese, B., Komppula, M., Preißler, J., Tesche, M., Ansmann, A., Wandinger, U., Lim, J.-H., Ahn, J. Y., Stachlewska, I. S., Amiridis, V., Marinou, E., Seifert, P., Hofer, J., Skupin, A., Schneider, F., Bohlmann, S., Foth, A., Bley, S., Pfüller, A., Giannakaki, E., Lihavainen, H., Viisanen, Y., Hooda, R. K., Pereira, S. N., Bortoli, D., Wagner, F., Mattis, I., Janicka, L., Markowicz, K. M., Achtert, P., Artaxo, P., Pauliquevis, T., Souza, R. A. F., Sharma, V. P., van Zyl, P. G., Beukes, J. P., Sun, J., Rohwer, E. G., Deng, R., Mamouri, R.-E., and Zamorano, F.: An overview of the first decade of PollyNET: an emerging network of automated Raman-polarization lidars for continuous aerosol profiling, *Atmospheric Chemistry and Physics*, 16, 5111–5137, <https://doi.org/10.5194/acp-16-5111-2016>, 2016.
- 385 Baars, H., Seifert, P., Engelmann, R., and Wandinger, U.: Target categorization of aerosol and clouds by continuous multiwavelength-polarization lidar measurements, *Atmospheric Measurement Techniques*, 10, 3175–3201, <https://doi.org/10.5194/amt-10-3175-2017>, 2017.
- Burton, S. P., Ferrare, R. A., Hostetler, C. A., Hair, J. W., Rogers, R. R., Obland, M. D., Butler, C. F., Cook, A. L., Harper, D. B., and Froyd, K. D.: Aerosol classification using airborne High Spectral Resolution Lidar measurements – methodology and examples, *Atmospheric Measurement Techniques*, 5, 73–98, <https://doi.org/10.5194/amt-5-73-2012>, 2012.
- 395 Burton, S. P., Hair, J. W., Kahnert, M., Ferrare, R. A., Hostetler, C. A., Cook, A. L., Harper, D. B., Berkoff, T. A., Seaman, S. T., Collins, J. E., Fenn, M. A., and Rogers, R. R.: Observations of the spectral dependence of linear particle depolarization ratio of aerosols using NASA Langley airborne High Spectral Resolution Lidar, *Atmospheric Chemistry and Physics*, 15, 13 453–13 473, <https://doi.org/10.5194/acp-15-13453-2015>, 2015.
- 400 Dubovik, O. and King, M. D.: A flexible inversion algorithm for retrieval of aerosol optical properties from Sun and sky radiance measurements, *Journal of Geophysical Research: Atmospheres*, 105, 20 673–20 696, <https://doi.org/10.1029/2000JD900282>, 2000.
- Dubovik, O., Sinyuk, A., Lapyonok, T., Holben, B. N., Mishchenko, M., Yang, P., Eck, T. F., Volten, H., Muñoz, O., Veihelmann, B., van der Zande, W. J., Leon, J.-F., Sorokin, M., and Slutsker, I.: Application of spheroid models to account for aerosol particle nonsphericity in remote sensing of desert dust, *Journal of Geophysical Research: Atmospheres*, 111, D11 208, <https://doi.org/10.1029/2005JD006619>, 2006.
- 405 Dubovik, O., Lapyonok, T., Litvinov, P., Herman, M., Fuertes, D., Ducos, F., Lopatin, A., Chaikovsky, A., Torres, B., Derimian, Y., Huang, X., Aspetsberger, M., and Federspiel, C.: GRASP: a versatile algorithm for characterizing the atmosphere, *SPIE: Newsroom*, <https://doi.org/doi:10.1117/2.1201408.005558>, 2014.

- Dubovik, O., Fuertes, D., Litvinov, P., Lopatin, A., Lapyonok, T., Dubovik, I., Xu, F., Ducos, F., Chen, C., Torres, B., Derimian, Y., Li, L.,  
 410 Herreras-Giralda, M., Herrera, M., Karol, Y., Matar, C., Schuster, G. L., Espinosa, R., Puthukkudy, A., Li, Z., Fischer, J., Preusker, R.,  
 Cuesta, J., Kreuter, A., Cede, A., Aspetsberger, M., Marth, D., Bindreiter, L., Hanger, A., Lanzinger, V., Holter, C., and Federspiel, C.: A  
 Comprehensive Description of Multi-Term LSM for Applying Multiple a Priori Constraints in Problems of Atmospheric Remote Sensing:  
 GRASP Algorithm, Concept, and Applications, *Frontiers in Remote Sensing*, 2, 23, <https://doi.org/10.3389/frsen.2021.706851>, 2021.
- Engelmann, R., Kanitz, T., Baars, H., Heese, B., Althausen, D., Skupin, A., Wandinger, U., Komppula, M., Stachlewska, I. S., Amiridis, V.,  
 415 Marinou, E., Mattis, I., Linné, H., and Ansmann, A.: The automated multiwavelength Raman polarization and water-vapor lidar PollyXT:  
 the neXT generation, *Atmospheric Measurement Techniques*, 9, 1767–1784, <https://doi.org/10.5194/amt-9-1767-2016>, 2016.
- Engelmann, R., Ansmann, A., Ohneiser, K., Griesche, H., Radenz, M., Hofer, J., Althausen, D., Dahlke, S., Maturilli, M., Veselovskii, I.,  
 Jimenez, C., Wiesen, R., Baars, H., Bühl, J., Gebauer, H., Haarig, M., Seifert, P., Wandinger, U., and Macke, A.: Wildfire smoke, Arctic  
 haze, and aerosol effects on mixed-phase and cirrus clouds over the North Pole region during MOSAiC: an introduction, *Atmospheric*  
 420 *Chemistry and Physics*, 21, 13 397–13 423, <https://doi.org/10.5194/acp-21-13397-2021>, 2021.
- Freudenthaler, V.: About the effects of polarising optics on lidar signals and the  $\Delta 90$  calibration, *Atmospheric Measurement Techniques*, 9,  
 4181–4255, <https://doi.org/10.5194/amt-9-4181-2016>, 2016.
- Freudenthaler, V., Esselborn, M., Wiegner, M., Heese, B., Tesche, M., Ansmann, A., Müller, D., Althausen, D., Wirth, M., Fix, A., Ehret,  
 G., Knippertz, P., Toledano, C., Gasteiger, J., Garhammer, M., and Seefeldner, M.: Depolarization ratio profiling at several wavelengths in  
 425 pure Saharan dust during SAMUM 2006, *Tellus B*, 61, 165–179, <https://doi.org/10.1111/j.1600-0889.2008.00396.x>, 2009.
- Gasteiger, J., Wiegner, M., Groß, S., Freudenthaler, V., Toledano, C., Tesche, M., and Kandler, K.: Modelling lidar-relevant optical properties  
 of complex mineral dust aerosols, *Tellus B*, 63, 725–741, <https://doi.org/10.1111/j.1600-0889.2011.00559.x>, 2011.
- Giles, D. M., Sinyuk, A., Sorokin, M. G., Schafer, J. S., Smirnov, A., Slutsker, I., Eck, T. F., Holben, B. N., Lewis, J. R., Campbell, J. R.,  
 Welton, E. J., Korkin, S. V., and Lyapustin, A. I.: Advancements in the Aerosol Robotic Network (AERONET) Version 3 database  
 430 – automated near-real-time quality control algorithm with improved cloud screening for Sun photometer aerosol optical depth (AOD)  
 measurements, *Atmospheric Measurement Techniques*, 12, 169–209, <https://doi.org/10.5194/amt-12-169-2019>, 2019.
- Groß, S., Esselborn, M., Weinzierl, B., Wirth, M., Fix, A., and Petzold, A.: Aerosol classification by airborne high spectral resolution lidar  
 observations, *Atmospheric Chemistry and Physics*, 13, 2487–2505, <https://doi.org/10.5194/acp-13-2487-2013>, 2013.
- Groß, S., Freudenthaler, V., Schepanski, K., Toledano, C., Schäfler, A., Ansmann, A., and Weinzierl, B.: Optical properties of long-range  
 435 transported Saharan dust over Barbados as measured by dual-wavelength depolarization Raman lidar measurements, *Atmospheric Chem-*  
*istry and Physics*, 15, 11 067–11 080, <https://doi.org/10.5194/acp-15-11067-2015>, 2015.
- Haarig, M., Engelmann, R., Ansmann, A., Veselovskii, I., Whiteman, D. N., and Althausen, D.: 1064 nm rotational Raman lidar for particle  
 extinction and lidar-ratio profiling: cirrus case study, *Atmospheric Measurement Techniques*, 9, 4269–4278, <https://doi.org/10.5194/amt-9-4269-2016>, 2016.
- 440 Haarig, M., Ansmann, A., Althausen, D., Klepel, A., Groß, S., Freudenthaler, V., Toledano, C., Mamouri, R.-E., Farrell, D. A., Prescod,  
 D. A., Marinou, E., Burton, S. P., Gasteiger, J., Engelmann, R., and Baars, H.: Triple-wavelength depolarization-ratio profiling  
 of Saharan dust over Barbados during SALTRACE in 2013 and 2014, *Atmospheric Chemistry and Physics*, 17, 10 767–10 794,  
<https://doi.org/10.5194/acp-17-10767-2017>, 2017.
- Haarig, M., Ansmann, A., Baars, H., Jimenez, C., Veselovskii, I., Engelmann, R., and Althausen, D.: Depolarization and lidar ratios at 355,  
 445 532, and 1064 nm and microphysical properties of aged tropospheric and stratospheric Canadian wildfire smoke, *Atmospheric Chemistry*  
*and Physics*, 18, 11 847–11 861, <https://doi.org/10.5194/acp-18-11847-2018>, 2018.

- Hofer, J., Ansmann, A., Althausen, D., Engelmann, R., Baars, H., Fomba, K. W., Wandinger, U., Abdullaev, S. F., and Makhmudov, A. N.: Optical properties of Central Asian aerosol relevant for spaceborne lidar applications and aerosol typing at 355 and 532 nm, *Atmospheric Chemistry and Physics*, 20, 9265–9280, <https://doi.org/10.5194/acp-20-9265-2020>, 2020.
- 450 Holben, B., Eck, T., Slutsker, I., Tanré, D., Buis, J., Setzer, A., Vermote, E., Reagan, J., Kaufman, Y., Nakajima, T., Lavenu, F., Jankowiak, I., and Smirnov, A.: AERONET—A Federated Instrument Network and Data Archive for Aerosol Characterization, *Remote Sensing of Environment*, 66, 1 – 16, [https://doi.org/http://dx.doi.org/10.1016/S0034-4257\(98\)00031-5](https://doi.org/http://dx.doi.org/10.1016/S0034-4257(98)00031-5), 1998.
- Hu, Q., Wang, H., Goloub, P., Li, Z., Veselovskii, I., Podvin, T., Li, K., and Korenskiy, M.: The characterization of Taklamakan dust properties using a multiwavelength Raman polarization lidar in Kashi, China, *Atmospheric Chemistry and Physics*, 20, 13 817–13 834, 455 <https://doi.org/10.5194/acp-20-13817-2020>, 2020.
- Jimenez, C., Ansmann, A., Engelmann, R., Donovan, D., Malinka, A., Schmidt, J., Seifert, P., and Wandinger, U.: The dual-field-of-view polarization lidar technique: a new concept in monitoring aerosol effects in liquid-water clouds – theoretical framework, *Atmospheric Chemistry and Physics*, 20, 15 247–15 263, <https://doi.org/10.5194/acp-20-15247-2020>, 2020.
- Kemppinen, O., Nousiainen, T., and Lindqvist, H.: The impact of surface roughness on scattering by realistically 460 shaped wavelength-scale dust particles, *Journal of Quantitative Spectroscopy and Radiative Transfer*, 150, 55 – 67, <https://doi.org/http://dx.doi.org/10.1016/j.jqsrt.2014.05.024>, 2015.
- Kim, M.-H., Omar, A. H., Tackett, J. L., Vaughan, M. A., Winker, D. M., Trepte, C. R., Hu, Y., Liu, Z., Poole, L. R., Pitts, M. C., Kar, J., and Magill, B. E.: The CALIPSO version 4 automated aerosol classification and lidar ratio selection algorithm, *Atmospheric Measurement Techniques*, 11, 6107–6135, <https://doi.org/10.5194/amt-11-6107-2018>, 2018.
- 465 Liu, Z., Omar, A., Vaughan, M., Hair, J., Kittaka, C., Hu, Y., Powell, K., Trepte, C., Winker, D., Hostetler, C., Ferrare, R., and Pierce, R.: CALIPSO lidar observations of the optical properties of Saharan dust: A case study of long-range transport, *Journal of Geophysical Research: Atmospheres*, 113, n/a–n/a, <https://doi.org/10.1029/2007JD008878>, d07207, 2008.
- Lopatin, A., Dubovik, O., Fuertes, D., Stenchikov, G., Lapyonok, T., Veselovskii, I., Wienhold, F. G., Shevchenko, I., Hu, Q., and Parajuli, S.: Synergy processing of diverse ground-based remote sensing and in situ data using the GRASP algorithm: applications to radiometer, lidar 470 and radiosonde observations, *Atmospheric Measurement Techniques*, 14, 2575–2614, <https://doi.org/10.5194/amt-14-2575-2021>, 2021.
- Mamouri, R.-E. and Ansmann, A.: Potential of polarization/Raman lidar to separate fine dust, coarse dust, maritime, and anthropogenic aerosol profiles, *Atmospheric Measurement Techniques*, 10, 3403–3427, <https://doi.org/10.5194/amt-10-3403-2017>, 2017.
- Mattis, I., Ansmann, A., Müller, D., Wandinger, U., and Althausen, D.: Dual-wavelength Raman lidar observations of the extinction-to-backscatter ratio of Saharan dust, *Geophysical Research Letters*, 29, 20–1–20–4, <https://doi.org/10.1029/2002GL014721>, 2002.
- 475 Miffre, A., Mehri, T., Francis, M., and Rairoux, P.: UV–VIS depolarization from Arizona Test Dust particles at exact backscattering angle, *Journal of Quantitative Spectroscopy and Radiative Transfer*, 169, 79 – 90, <https://doi.org/http://dx.doi.org/10.1016/j.jqsrt.2015.09.016>, 2016.
- Müller, D., Ansmann, A., Freudenthaler, V., Kandler, K., Toledano, C., Hiebsch, A., Gasteiger, J., Esselborn, M., Tesche, M., Heese, B., Althausen, D., Weinzierl, B., Petzold, A., and von Hoyningen-Huene, W.: Mineral dust observed with AERONET Sun photometer, Raman 480 lidar, and in situ instruments during SAMUM 2006: Shape-dependent particle properties, *Journal of Geophysical Research: Atmospheres*, 115, D11 207, <https://doi.org/10.1029/2009JD012523>, 2010.
- Müller, D., Lee, K.-H., Gasteiger, J., Tesche, M., Weinzierl, B., Kandler, K., Müller, T., Toledano, C., Otto, S., Althausen, D., and Ansmann, A.: Comparison of optical and microphysical properties of pure Saharan mineral dust observed with AERONET Sun pho-

- tometer, Raman lidar, and in situ instruments during SAMUM 2006, *Journal of Geophysical Research: Atmospheres*, 117, D07211, <https://doi.org/10.1029/2011JD016825>, 2012.
- 485 Noh, Y., Müller, D., Lee, K., Kim, K., Lee, K., Shimizu, A., Sano, I., and Park, C. B.: Depolarization ratios retrieved by AERONET sun-sky radiometer data and comparison to depolarization ratios measured with lidar, *Atmospheric Chemistry and Physics*, 17, 6271–6290, <https://doi.org/10.5194/acp-17-6271-2017>, 2017.
- Omar, A. H., Winker, D. M., Vaughan, M. A., Hu, Y., Trepte, C. R., Ferrare, R. A., Lee, K.-P., Hostetler, C. A., Kittaka, C., Rogers, R. R., Kuehn, R. E., and Liu, Z.: The CALIPSO Automated Aerosol Classification and Lidar Ratio Selection Algorithm, *Journal of Atmospheric and Oceanic Technology*, 26, 1994–2014, <https://doi.org/10.1175/2009JTECHA1231.1>, 2009.
- 490 Ortiz-Amezcuca, P., Bedoya-Velásquez, A. E., Benavent-Oltra, J. A., Pérez-Ramírez, D., Veselovskii, I., Castro-Santiago, M., Bravo-Aranda, J. A., Guedes, A., Guerrero-Rascado, J. L., and Alados-Arboledas, L.: Implementation of UV rotational Raman channel to improve aerosol retrievals from multiwavelength lidar, *Opt. Express*, 28, 8156–8168, <https://doi.org/10.1364/OE.383441>, 2020.
- 495 Pappalardo, G., Amodeo, A., Apituley, A., Comeron, A., Freudenthaler, V., Linné, H., Ansmann, A., Bösenberg, J., D’Amico, G., Mattis, I., Mona, L., Wandinger, U., Amiridis, V., Alados-Arboledas, L., Nicolae, D., and Wiegner, M.: EARLINET: towards an advanced sustainable European aerosol lidar network, *Atmospheric Measurement Techniques*, 7, 2389–2409, <https://doi.org/10.5194/amt-7-2389-2014>, 2014.
- PollyNET: PollyNET, <https://polly.tropos.de/>, 2021.
- Radenz, M., Seifert, P., Baars, H., Floutsi, A. A., Yin, Z., and Bühl, J.: Automated time–height-resolved air mass source attribution for profiling remote sensing applications, *Atmospheric Chemistry and Physics*, 21, 3015–3033, <https://doi.org/10.5194/acp-21-3015-2021>, 2021.
- 500 Saito, M., Yang, P., Ding, J., and Liu, X.: A Comprehensive Database of the Optical Properties of Irregular Aerosol Particles for Radiative Transfer Simulations, *Journal of the Atmospheric Sciences*, 78(7), 2089–2111, <https://journals.ametsoc.org/view/journals/atms/78/7/JAS-D-20-0338.1.xml>, 2021.
- 505 Schuster, G. L., Vaughan, M., MacDonnell, D., Su, W., Winker, D., Dubovik, O., Lapyonok, T., and Trepte, C.: Comparison of CALIPSO aerosol optical depth retrievals to AERONET measurements, and a climatology for the lidar ratio of dust, *Atmospheric Chemistry and Physics*, 12, 7431–7452, <https://doi.org/10.5194/acp-12-7431-2012>, 2012.
- Shin, S.-K., Tesche, M., Kim, K., Kezoudi, M., Tatarov, B., Müller, D., and Noh, Y.: On the spectral depolarisation and lidar ratio of mineral dust provided in the AERONET version 3 inversion product, *Atmospheric Chemistry and Physics*, 18, 12735–12746, <https://doi.org/10.5194/acp-18-12735-2018>, 2018.
- 510 Sinyuk, A., Holben, B. N., Eck, T. F., Giles, D. M., Slutsker, I., Korkin, S., Schafer, J. S., Smirnov, A., Sorokin, M., and Lyapustin, A.: The AERONET Version 3 aerosol retrieval algorithm, associated uncertainties and comparisons to Version 2, *Atmospheric Measurement Techniques*, 13, 3375–3411, <https://doi.org/10.5194/amt-13-3375-2020>, 2020.
- Stein, A. F., Draxler, R. R., Rolph, G. D., Stunder, B. J. B., Cohen, M. D., and Ngan, F.: NOAA’s HYSPLIT Atmospheric Transport and Dispersion Modeling System, *Bulletin of the American Meteorological Society*, 96, 2059–2077, <https://doi.org/10.1175/BAMS-D-14-00110.1>, 2015.
- 515 Tesche, M., Ansmann, A., Müller, D., Althausen, D., Mattis, I., Heese, B., Freudenthaler, V., Wiegner, M., Esselborn, M., Pisani, G., and Knippertz, P.: Vertical profiling of Saharan dust with Raman lidars and airborne HSRL in southern Morocco during SAMUM, *Tellus B*, 61, 144–164, <https://doi.org/10.1111/j.1600-0889.2008.00390.x>, 2009.

- 520 Tesche, M., Groß, S., Ansmann, A., Müller, D., Althausen, D., Freudenthaler, V., and Esselborn, M.: Profiling of Saharan dust and biomass-burning smoke with multiwavelength polarization Raman lidar at Cape Verde, *Tellus B*, 63, 649–676, <https://doi.org/10.1111/j.1600-0889.2011.00548.x>, 2011.
- Toledano, C., Torres, B., Velasco-Merino, C., Althausen, D., Groß, S., Wiegner, M., Weinzierl, B., Gasteiger, J., Ansmann, A., González, R., Mateos, D., Farrel, D., Müller, T., Haarig, M., and Cachorro, V. E.: Sun photometer retrievals of Saharan dust properties over Barbados during SALTRACE, *Atmospheric Chemistry and Physics*, 19, 14 571–14 583, <https://doi.org/10.5194/acp-19-14571-2019>, 2019.
- 525 Torres, B., Dubovik, O., Fuertes, D., Schuster, G., Cachorro, V. E., Lapyonok, T., Goloub, P., Blarel, L., Barreto, A., Mallet, M., Toledano, C., and Tanré, D.: Advanced characterisation of aerosol size properties from measurements of spectral optical depth using the GRASP algorithm, *Atmospheric Measurement Techniques*, 10, 3743–3781, <https://doi.org/10.5194/amt-10-3743-2017>, 2017.
- Vaughan, M. A., Liu, Z., McGill, M. J., Hu, Y., and Obland, M. D.: On the spectral dependence of backscatter from cirrus clouds: Assessing CALIOP's 1064 nm calibration assumptions using cloud physics lidar measurements, *Journal of Geophysical Research: Atmospheres*, 115, <https://doi.org/https://doi.org/10.1029/2009JD013086>, 2010.
- 530 Veselovskii, I., Whiteman, D. N., Korenskiy, M., Suvorina, A., and Pérez-Ramírez, D.: Use of rotational Raman measurements in multi-wavelength aerosol lidar for evaluation of particle backscattering and extinction, *Atmospheric Measurement Techniques*, 8, 4111–4122, <https://doi.org/10.5194/amt-8-4111-2015>, 2015.
- 535 Veselovskii, I., Goloub, P., Podvin, T., Bovchaliuk, V., Derimian, Y., Augustin, P., Fourmentin, M., Tanre, D., Korenskiy, M., Whiteman, D. N., Diallo, A., Ndiaye, T., Kolgotin, A., and Dubovik, O.: Retrieval of optical and physical properties of African dust from multi-wavelength Raman lidar measurements during the SHADOW campaign in Senegal, *Atmospheric Chemistry and Physics*, 16, 7013–7028, <https://doi.org/10.5194/acp-16-7013-2016>, 2016.
- Veselovskii, I., Hu, Q., Goloub, P., Podvin, T., Korenskiy, M., Derimian, Y., Legrand, M., and Castellanos, P.: Variability in lidar-derived particle properties over West Africa due to changes in absorption: towards an understanding, *Atmospheric Chemistry and Physics*, 20, 6563–6581, <https://doi.org/10.5194/acp-20-6563-2020>, 2020.
- 540 Weinzierl, B., Ansmann, A., Prospero, J. M., Althausen, D., Benker, N., Chouza, F., Dollner, M., Farrell, D., Fomba, W. K., Freudenthaler, V., Gasteiger, J., Groß, S., Haarig, M., Heinold, B., Kandler, K., Kristensen, T. B., Mayol-Bracero, O. L., Müller, T., Reitebuch, O., Sauer, D., Schäfler, A., Schepanski, K., Spanu, A., Tegen, I., Toledano, C., and Walser, A.: The Saharan Aerosol Long-range Transport and Aerosol-Cloud-Interaction Experiment (SALTRACE): overview and selected highlights, *Bulletin of the American Meteorological Society*, 98, 1427–1451, <https://doi.org/10.1175/BAMS-D-15-00142.1>, 2017.
- 545 Whiteman, D. N.: Examination of the traditional Raman lidar technique. I. Evaluating the temperature-dependent lidar equations, *Appl. Opt.*, 42, 2571–2592, <https://doi.org/10.1364/AO.42.002571>, 2003a.
- Whiteman, D. N.: Examination of the traditional Raman lidar technique. II. Evaluating the ratios for water vapor and aerosols, *Appl. Opt.*, 42, 2593–2608, <https://doi.org/10.1364/AO.42.002593>, 2003b.
- 550 Yorks, J. E., McGill, M. J., Palm, S. P., Hlavka, D. L., Selmer, P. A., Nowottnick, E. P., Vaughan, M. A., Rodier, S. D., and Hart, W. D.: An overview of the CATS level 1 processing algorithms and data products, *Geophysical Research Letters*, 43, 4632–4639, <https://doi.org/10.1002/2016GL068006>, 2016.

**Table 1.** Intensive optical properties of Saharan dust observed at Leipzig on 22–23 February (pure dust case) and 3 March 2021 (slightly polluted dust case). For comparison, the optical properties of long-range-transported Saharan dust at Barbados as observed during the SALTRACE campaign are provided, the PLDR during SALTRACE are taken from Haarig et al. (2017). **The PLDR of the Leipzig cases are reported for the 3-wavelength depolarization setup of the measurement (first 20 min), whereas the other properties are reported for the 3-wavelength extinction measurement.** SAL – Saharan Air layer, PLDR – particle linear depolarization ratio, EAE – extinction Ångström exponent, BAE – backscatter Ångström exponent

|                       | Wvl. (nm) | 22–23 Feb 2021                   | 3 March 2021       | SALTRACE               |
|-----------------------|-----------|----------------------------------|--------------------|------------------------|
| Height range          |           | 3–5 km                           | <b>2–3.5 km</b>    | SAL                    |
|                       | 355       | 47±8 sr                          | <b>49±4 sr</b>     | 59±16 sr               |
| Lidar ratio           | 532       | 50±5 sr                          | <b>46±5 sr</b>     | 57±8 sr                |
|                       | 1064      | <b>69±14 sr</b>                  | <b>57±9 sr</b>     | 67±15 sr <sup>a</sup>  |
| Ratio of lidar ratios | 355/532   | 0.94±0.19                        | <b>1.07±0.14</b>   | 1.04±0.30              |
|                       | 1064/532  | <b>1.38±0.31</b>                 | <b>1.24±0.24</b>   | 1.31±0.32 <sup>b</sup> |
|                       | 355       | <b>0.242±0.024</b>               | <b>0.174±0.041</b> | 0.252±0.030            |
| PLDR                  | 532       | <b>0.299±0.018</b>               | <b>0.292±0.016</b> | 0.280±0.020            |
|                       | 1064      | <b>0.206±0.010</b>               | <b>0.242±0.007</b> | 0.225±0.022            |
| Ratio of PLDR         | 355/532   | <b>0.81±0.09</b>                 | <b>0.60±0.14</b>   | 0.90±0.12              |
|                       | 1064/532  | <b>0.69±0.05</b>                 | <b>0.83±0.05</b>   | 0.80±0.10              |
|                       | 355/532   | <b>−0.005±0.186</b> <sup>c</sup> | <b>0.332±0.051</b> | 0.103±0.254            |
| EAE                   | 532/1064  | <b>−0.083±0.213</b>              | <b>0.008±0.079</b> | –                      |
|                       | 355/1064  | <b>−0.098±0.139</b>              | <b>0.128±0.067</b> | –                      |
|                       | 355/532   | <b>0.040±0.524</b> <sup>c</sup>  | <b>0.120±0.276</b> | −0.030±0.153           |
| BAE                   | 532/1064  | 0.347±0.260                      | <b>0.345±0.260</b> | 0.474±0.201            |
|                       | 355/1064  | 0.187±0.193                      | <b>0.262±0.144</b> | –                      |

<sup>a</sup> Estimated using lidar and AERONET.

<sup>b</sup> Here the lidar ratio at 532 nm (51 sr) of the same day (20 June 2014) was used.

<sup>c</sup> Polly<sup>XT</sup> data at 355 and 532 nm were used.

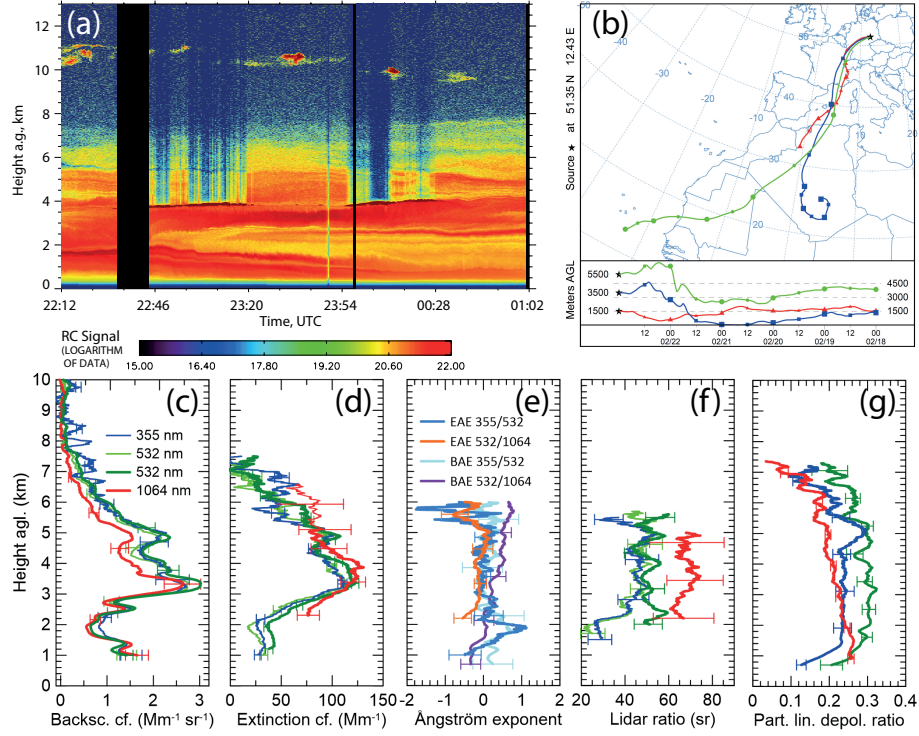

**Figure 1.** Saharan dust observations at Leipzig on 22–23 February 2021, 22:12–01:02 UTC, (a) time-height display of the 532 nm cross-polarized, range-corrected signal. (b) HYSPLIT backtrajectory for 23 February 2021, 00:00 UTC (<2 days from the Sahara to Leipzig). (c) Particle backscatter coefficient (200 m vertical smoothing), (d) particle extinction coefficient (950 m vertical smoothing, 2000 m (3290 m) at 1064 nm below (above) 5 km), (e) extinction Ångström exponent (EAE) and backscatter Ångström exponent (BAE) for the given wavelengths pairs, 355/532 from Polly<sup>XT</sup>, 532/1064 from BERTHA, (f) lidar ratio (950 m vertical smoothing, 2000 m at 1064 nm), (g) particle linear depolarization ratio (200 m vertical smoothing, 750 m at 355 nm). BERTHA provided measurements at 532 nm (dark green) and 1064 nm (red) and Polly<sup>XT</sup> at 355 nm (blue) and 532 nm (light green). All optical properties are shown for the period 22:45–01:02 UTC, except the depolarization ratios are shown 22:12–22:32 UTC to be at the same time as the 1064 nm depolarization ratio measurement.

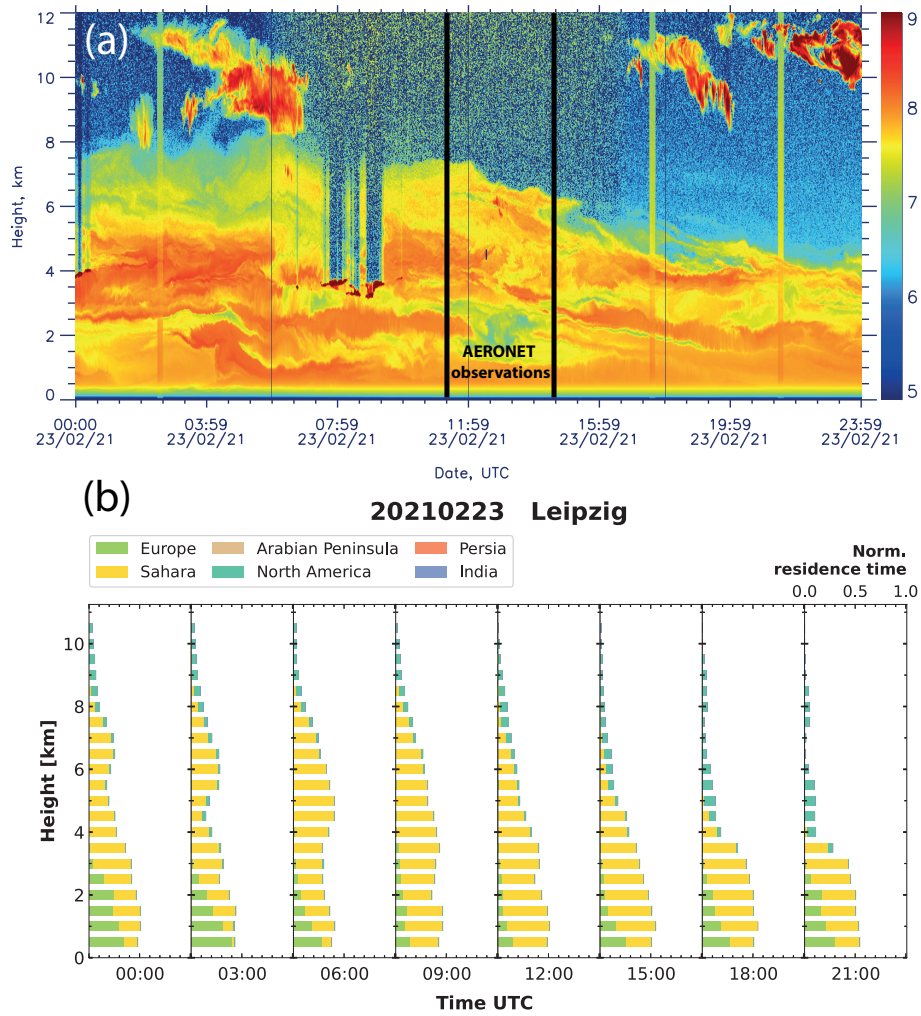

**Figure 2.** Development of the dust layer over Leipzig on 23 February 2021. (a) Cross-polarized, range-corrected signal at 532 nm measured with Polly<sup>XT</sup>. The period of the five AERONET observations is marked by thick black vertical bars. (b) Source attribution in 3-hour intervals by using the method of Radenz et al. (2021). The normalized residence time of the air masses close to the ground (below 2 km height) within 10 days prior to the arrival over Leipzig at the indicated time stamps on 23 February 2021 is shown. The trajectory calculations are based on FLEXPART. The colors indicate different regions defined in Radenz et al. (2021). Here, the Saharan desert, continental Europe **and North America** are relevant.

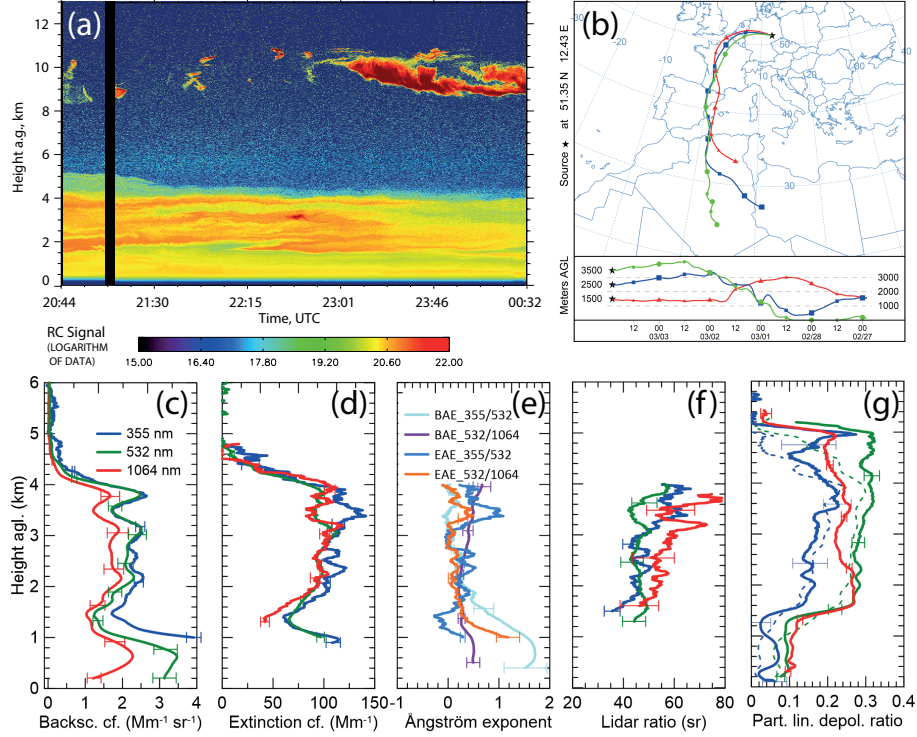

**Figure 3.** Same as Fig. 1, except for 3-4 March 2021, 20:44–00:32 UTC, (a) time-height display of the 532 nm cross-polarized, range-corrected signal. (b) HYSPLIT backtrajectory for 3 March 2021, 22:00 UTC. (c) Particle backscatter coefficient (200 m vertical smoothing), (d) particle extinction coefficient (750 m vertical smoothing), (e) extinction Ångström exponent (EAE, 750 m vertical smoothing) and backscatter Ångström exponent (BAE, 200 m vertical smoothing) for the given wavelengths pairs, (f) lidar ratio (750 m vertical smoothing), (g) particle linear depolarization ratio PLDR (200 m vertical smoothing). **All shown optical properties are the mean profiles from 21:11–00:32 UTC, except the thick lines of PLDR (20:44–21:04 UTC). The dashed lines of the PLDR at 355 and 532 nm belong to the main measurement at 21:11–00:32 UTC, where the dust layer height decreased.**

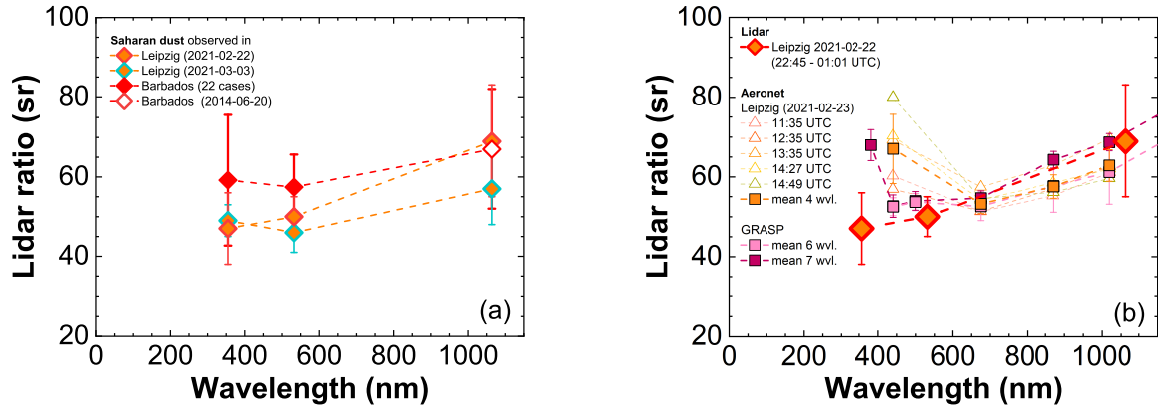

**Figure 4.** (a) Spectral dependence of the lidar ratio of Saharan dust observed at Leipzig and Barbados (during SALTRACE). The lidar ratio at 1064 nm during SALTRACE (open diamond) was estimated on 20 June 2014 combining AERONET AOD and lidar observations (see text for explanations and Mamouri and Ansmann (2017)). (b) Spectral dependence of the lidar ratio of Saharan dust observed in the night of 22–23 February 2021 compared with AERONET v3 inversion solutions for the lidar ratio on 23 February 2021. The results of the five photometer scans (open triangles) at indicated times are shown together with the mean of the four-wavelength retrieval (orange squares, standard retrieval) and the six and seven wavelength retrieval (pink and purple squares, GRASP method). The GRASP retrieval at 1640 nm (not shown) leads to lidar ratios of  $94 \pm 8$  (using six wavelengths) and  $101 \pm 4$  sr (using seven wavelengths) for this long wavelength.

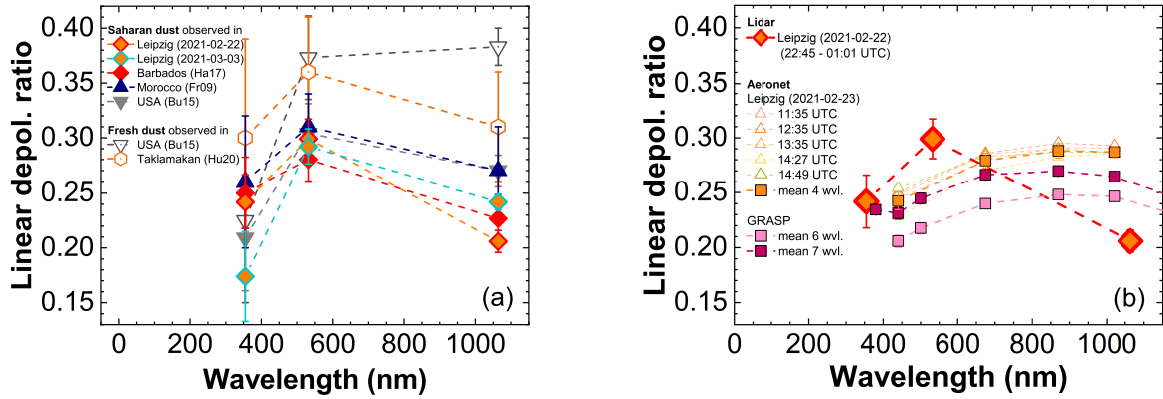

**Figure 5.** (a) Spectral dependence of the particle linear depolarization ratio (PLDR) of desert dust. The Leipzig observations are compared with triple-wavelength depolarization-ratio measurements of Saharan dust and fresh dust available in the literature (Ha17 – Haarig et al. (2017), Fr09 – Freudenthaler et al. (2009), Bu15 – Burton et al. (2015), Hu20 – Hu et al. (2020)). (b) Spectral dependence of the PLDR of Saharan dust observed in the night of 22–23 February 2021 compared with AERONET v3 inversion solutions for the PLDR on 23 February 2021. The results of the five photometer scans at indicated times are shown together with the mean of the four wavelength retrieval (orange squares, standard retrieval) and the six and seven wavelength retrieval (pink and purple squares, GRASP method). The GRASP retrieval at 1640 nm (not shown) leads to PLDR values of  $0.184 \pm 0.007$  (using six wavelengths) and  $0.192 \pm 0.008$  (using seven wavelengths) for this long wavelength.
